# Supplementary material
Source: Research Square preprint supplement (doi:10.21203/rs.3.rs-9164835/v1)
Supplement: Supplementary file 1 [file 6b6ffe1bdf45fc7056ac8a0c.docx]

Table S1 Primers and probes for real-time PCR assay.

| **Assay** | **Target** | **Oligo** | **Name** | **Sequence (5′–3′)** | **Dye-Quencher** |
| --- | --- | --- | --- | --- | --- |
| qPCR duplex | STX17 intron6 duplication junction | Forward primer | STX17-junction-F | TGGACTTGTAGTATCAGCACCAC | – |
|  |  | Reverse primer | STX17-junction-R | GGGCAAGAGCAGAAGGATTA | – |
|  |  | Probe | STX17-junction-P | GCAAAATCTCAGAATTGGAA | FAM–MGB |
| qPCR duplex | MSTN exon4 | Forward primer | MSTN-F | GCCCCTCTTTTTCCACATTTT | – |
|  |  | Reverse primer | MSTN-R | TCTTGCTGGTCCAGTGGATCT | – |
|  |  | Probe | MSTN-P | TGCTCGCTGTTCTCAT | VIC–MGB |

Table S2 Primers and probes for ddPCR assay.

| **Assay** | **Target** | **Oligo** | **Name** | **Sequence (5′–3′)** | **Dye–Quencher** |
| --- | --- | --- | --- | --- | --- |
| ddPCR duplex | STX17 intron6 internal region | Forward primer | STX17-int6-F | TTTTGCCTCTTTTTGAACAATTACTG | – |
|  |  | Reverse primer | STX17-int6-R | AGAGCCTCAAAACGGAATGGT | – |
|  |  | Probe | STX17-int6-P | AAGGATGCTTTCTGCTTC | FAM–MGB |
| ddPCR duplex | MSTN exon4 | Forward primer | MSTN-ex4-F | GCCCCTCTTTTTCCACATTTT | – |
|  |  | Reverse primer | MSTN-ex4-R | TCTTGCTGGTCCAGTGGATCT | – |
|  |  | Probe | MSTN-ex4-P | TGCTCGCTGTTCTCAT | VIC–MGB |

Table S3 Primers and probes for LA-PCR assay.

| **Assay** | **Target** | **Primer** | **Name** | **Sequence (5′–3′)** |
| --- | --- | --- | --- | --- |
| LA-PCR | STX17 intron6 duplication | Forward primer | DupForward | GGAACATAAAGTAGATTTGGTGGGAAAG |
|  |  | Reverse primer | DupReverseN | TTCTGATAAATGCATAAACCCACGTAAC |
|  |  | Reverse primer | DupReverseD | TTCCAATTCTGAGATTTTGCATTTCTAA |
