# Supplementary material
Source: Research Square preprint supplement (doi:10.21203/rs.3.rs-9164835/v1)

**Graphical Abstract**


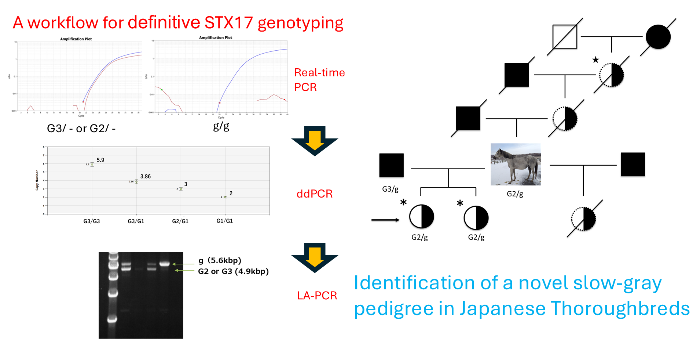

Supplement: Supplementary file 2 [file ead5316fe0a377b6c748f9e3.docx]
